# Supplementary material
Source: PubMed Central journal article supplement (PMC3916901)
Supplement: NIHMS542333-supplement-2.pdf [file NIHMS542333-supplement-2.pdf]

**Supplemental Digital Content 2: Table.** Details of the multivariable multinomial logistic regression model examining the association between technological capacity and treatment (i.e., surgery, radiotherapy, or observation). We characterized the capacity for delivering treatment with new technology for each Hospital Referral Region and year by calculating robotic prostatectomy and IMRT provider densities. The numerator was the number of physicians providing robotic prostatectomy or IMRT treatments in each HRR in a given year. The denominator was the number of male Medicare beneficiaries residing within the HRR based on population estimates for the ZIP Code Tabulation Areas. From this model, we calculated adjusted treatment rates (number of men treated per 1,000 diagnosed) for HRRs with low versus high robotic prostatectomy capacity (i.e., robotic prostatectomy capacity in the lowest versus highest tertile, respectively) and low versus high IMRT capacity (i.e., IMRT capacity in the lowest versus highest tertile, respectively). CI: confidence interval; IMRT: intensity-modulated radiotherapy. McFadden's pseudo  $R^2$  for this model was 0.158.

|                                                                                         | Relative Risk Ratio | Lower bound of 95% CI | Upper bound of 95% CI | p-value |
|-----------------------------------------------------------------------------------------|---------------------|-----------------------|-----------------------|---------|
| <b>Surgery versus Observation</b>                                                       |                     |                       |                       |         |
| <b>Robotic prostatectomy provider density (per 100,000 male Medicare beneficiaries)</b> | 1.02                | 1.01                  | 1.04                  | 0.006   |
| <b>IMRT provider density (per 100,000 male Medicare beneficiaries)</b>                  | 1.00                | 0.98                  | 1.01                  | 0.767   |
| <b>Year of diagnosis</b>                                                                |                     |                       |                       |         |
| 2003                                                                                    | Reference           |                       |                       |         |
| 2004                                                                                    | 0.94                | 0.82                  | 1.08                  | 0.410   |
| 2005                                                                                    | 0.87                | 0.73                  | 1.04                  | 0.132   |
| 2006                                                                                    | 0.94                | 0.78                  | 1.13                  | 0.524   |
| 2007                                                                                    | 1.08                | 0.89                  | 1.32                  | 0.450   |
| <b>Age in years</b>                                                                     | 0.70                | 0.69                  | 0.72                  | <0.001  |
|                                                                                         |                     |                       |                       |         |

|                                                                                      | Relative Risk Ratio | Lower bound of 95% CI | Upper bound of 95% CI | p-value |
|--------------------------------------------------------------------------------------|---------------------|-----------------------|-----------------------|---------|
| <b>Race</b>                                                                          |                     |                       |                       |         |
| White                                                                                | Reference           |                       |                       |         |
| African American                                                                     | 0.33                | 0.29                  | 0.39                  | <0.001  |
| Hispanic                                                                             | 1.00                | 0.80                  | 1.26                  | 0.970   |
| Asian                                                                                | 0.84                | 0.67                  | 1.05                  | 0.131   |
| Other/Unknown                                                                        | 0.90                | 0.69                  | 1.19                  | 0.473   |
| <b>Comorbidity</b>                                                                   |                     |                       |                       |         |
| 0                                                                                    | Reference           |                       |                       |         |
| 1                                                                                    | 0.82                | 0.75                  | 0.89                  | <0.001  |
| 2                                                                                    | 0.48                | 0.42                  | 0.53                  | <0.001  |
| 3 or more                                                                            | 0.23                | 0.19                  | 0.29                  | <0.001  |
| <b>Clinical Stage</b>                                                                |                     |                       |                       |         |
| 1                                                                                    | Reference           |                       |                       |         |
| 2                                                                                    | 1.09                | 0.95                  | 1.25                  | 0.227   |
| 3                                                                                    | 0.96                | 0.67                  | 1.38                  | 0.830   |
| 4                                                                                    | 0.19                | 0.10                  | 0.37                  | <0.001  |
| <b>Grade</b>                                                                         |                     |                       |                       |         |
| Well / moderately differentiated                                                     | Reference           |                       |                       |         |
| Poorly / undifferentiated                                                            | 2.78                | 2.57                  | 3.02                  | <0.001  |
| <b>Living in census tract in which 25% or more of adults had a college education</b> | 1.26                | 1.15                  | 1.39                  | <0.001  |
| <b>Median annual household income of census tract</b>                                | 1.06                | 1.03                  | 1.08                  | <0.001  |
| <b>Residing in urban area</b>                                                        | 1.07                | 0.80                  | 1.44                  | 0.630   |
| <b>Number of urologists per 100,000 population</b>                                   | 1.00                | 1.00                  | 1.00                  | 0.219   |
| <b>Number of radiation oncologists per 100,000 population</b>                        | 1.00                | 1.00                  | 1.00                  | 0.578   |
| <b>Number of hospital beds per 100,000 population</b>                                | 1.00                | 1.00                  | 1.00                  | 0.072   |
| <b>Medicare advantage penetration (%)</b>                                            | 1.01                | 1.00                  | 1.01                  | 0.231   |
| <b>Radiation oncologist volume</b>                                                   | 1.00                | 0.99                  | 1.01                  | 0.648   |
| <b>Surgeon volume</b>                                                                | 1.05                | 1.03                  | 1.07                  | <0.001  |

|                                                                                         | Relative Risk Ratio | Lower bound of 95% CI | Upper bound of 95% CI | p-value |
|-----------------------------------------------------------------------------------------|---------------------|-----------------------|-----------------------|---------|
| <b>Radiation versus Observation</b>                                                     |                     |                       |                       |         |
| <b>Robotic prostatectomy provider density (per 100,000 male Medicare beneficiaries)</b> | 1.00                | 0.98                  | 1.01                  | 0.371   |
| <b>IMRT provider density (per 100,000 male Medicare beneficiaries)</b>                  | 1.01                | 0.99                  | 1.02                  | 0.365   |
| <b>Year of diagnosis</b>                                                                |                     |                       |                       |         |
| 2003                                                                                    | Reference           |                       |                       |         |
| 2004                                                                                    | 1.06                | 0.99                  | 1.14                  | 0.098   |
| 2005                                                                                    | 1.08                | 0.99                  | 1.19                  | 0.091   |
| 2006                                                                                    | 1.16                | 1.05                  | 1.28                  | 0.002   |
| 2007                                                                                    | 1.25                | 1.11                  | 1.40                  | <0.001  |
| <b>Age in years</b>                                                                     | 0.88                | 0.87                  | 0.88                  | <0.001  |
| <b>Race</b>                                                                             |                     |                       |                       |         |
| White                                                                                   | Reference           |                       |                       |         |
| African American                                                                        | 0.62                | 0.56                  | 0.69                  | <0.001  |
| Hispanic                                                                                | 1.04                | 0.86                  | 1.27                  | 0.681   |
| Asian                                                                                   | 1.27                | 0.91                  | 1.77                  | 0.156   |
| Other/Unknown                                                                           | 0.95                | 0.73                  | 1.23                  | 0.693   |
| <b>Comorbidity</b>                                                                      |                     |                       |                       |         |
| 0                                                                                       | Reference           |                       |                       |         |
| 1                                                                                       | 1.10                | 1.05                  | 1.15                  | <0.001  |
| 2                                                                                       | 0.87                | 0.81                  | 0.94                  | <0.001  |
| 3 or more                                                                               | 0.67                | 0.61                  | 0.74                  | <0.001  |
| <b>Clinical Stage</b>                                                                   |                     |                       |                       |         |
| 1                                                                                       | Reference           |                       |                       |         |
| 2                                                                                       | 0.94                | 0.86                  | 1.03                  | 0.180   |
| 3                                                                                       | 1.43                | 1.18                  | 1.73                  | <0.001  |
| 4                                                                                       | 0.54                | 0.39                  | 0.75                  | <0.001  |
| <b>Grade</b>                                                                            |                     |                       |                       |         |
| Well / moderately differentiated                                                        | Reference           |                       |                       |         |
| Poorly / undifferentiated                                                               | 1.44                | 1.34                  | 1.54                  | <0.001  |
| <b>Living in census tract in which 25% or more of adults had a college education</b>    | 1.14                | 1.06                  | 1.24                  | 0.001   |
| <b>Median annual household income of census tract</b>                                   | 1.05                | 1.03                  | 1.07                  | <0.001  |
| <b>Residing in urban area</b>                                                           | 1.24                | 1.07                  | 1.44                  | 0.004   |
| <b>Number of urologists per 100,000 population</b>                                      | 1.00                | 1.00                  | 1.00                  | 0.262   |
| <b>Number of radiation oncologists per 100,000 population</b>                           | 1.00                | 1.00                  | 1.00                  | 0.621   |
|                                                                                         |                     |                       |                       |         |

|                                                       | Relative Risk Ratio | Lower bound of 95% CI | Upper bound of 95% CI | p-value |
|-------------------------------------------------------|---------------------|-----------------------|-----------------------|---------|
| <b>Number of hospital beds per 100,000 population</b> | 1.00                | 1.00                  | 1.00                  | 0.612   |
| <b>Medicare advantage penetration (%)</b>             | 0.99                | 0.99                  | 1.00                  | 0.074   |
| <b>Radiation oncologist volume</b>                    | 1.01                | 1.01                  | 1.01                  | <0.001  |
| <b>Surgeon volume</b>                                 | 0.99                | 0.98                  | 1.00                  | 0.086   |
