# Supplementary material
Source: PubMed Central journal article supplement (PMC3916901)

**Supplemental Digital Content 3: Figure.** Rates of specific treatments according to market-level technological capacity. In markets with high robotic prostatectomy capacity, the increased use of radical prostatectomy was primarily driven by an increase in use of robotic prostatectomy (85 vs. 42 per 1,000 men diagnosed,  $p < 0.001$ ). High IMRT capacity was associated with a significant increase in use of IMRT (352 vs. 220 per 1,000 men,  $p < 0.001$ ), but this was offset by decreases in use of external beam radiotherapy and brachytherapy.

\* Models were adjusted for year, patient characteristics (age, comorbidity, stage, grade, socioeconomic status), and market characteristics (number of urologists, of radiation oncologists, and of hospital beds; managed care penetration; average provider volume in market).

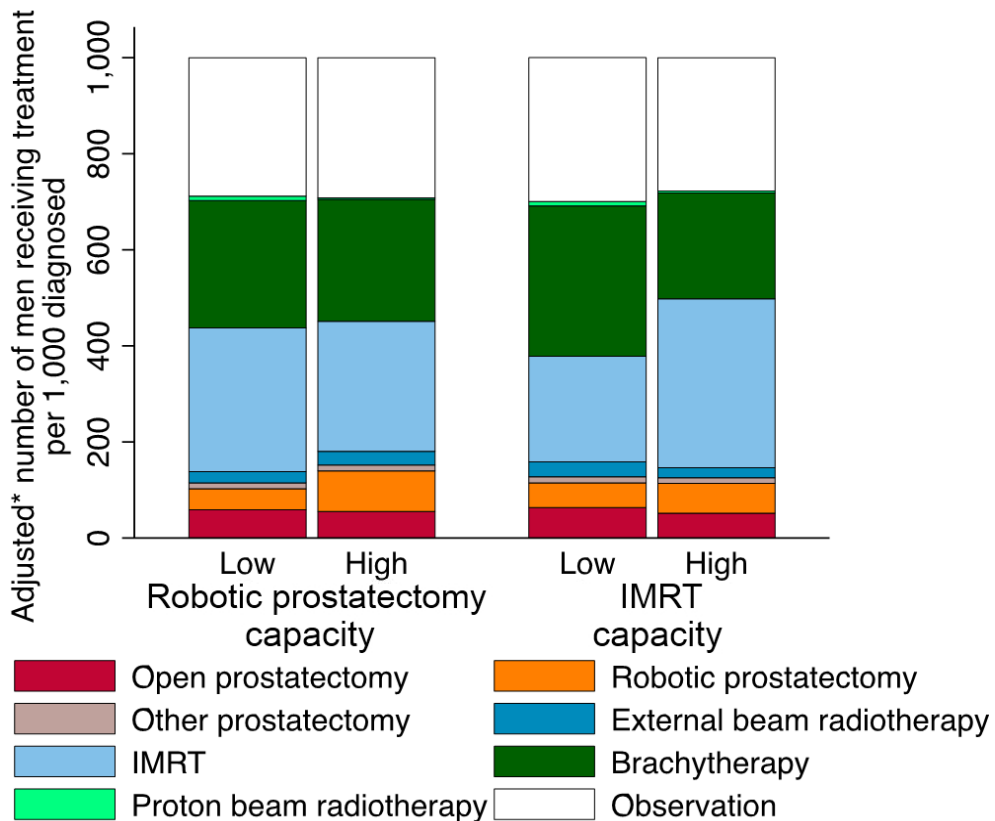

Supplement: NIHMS542333-supplement-3.pdf [file NIHMS542333-supplement-3.pdf]
